# Supplementary material for: The importance of being porous: polysaccharide-derived mesoporous materials for use in dye adsorption
Source: Royal Society of Chemistry journal article supplement (doi:10.1039/c2ra21367b), 2012-01-01

## Supplementary Material

SF. 1 TEM images of A) S300, B) S450, C) S800, D) A300, E) A450 and F) A800

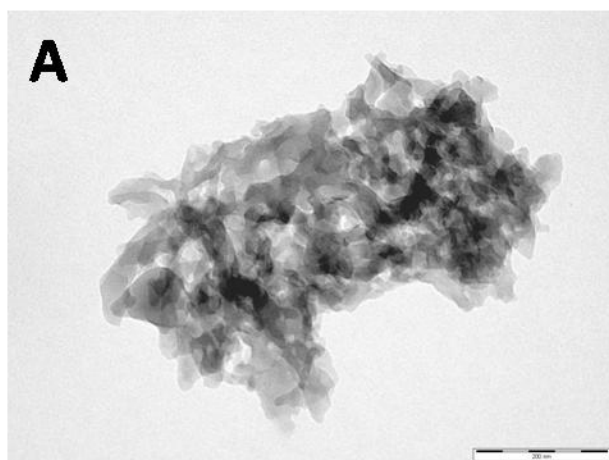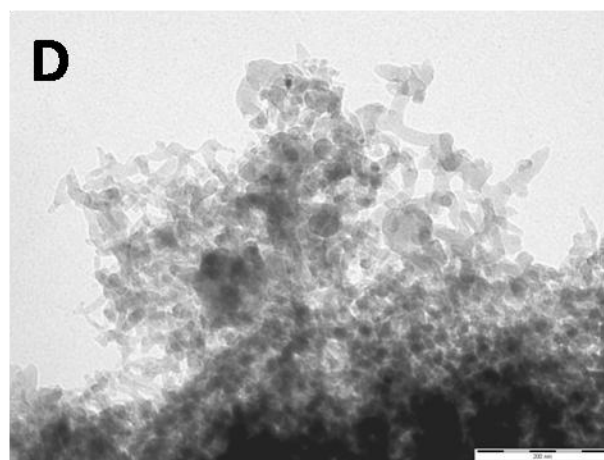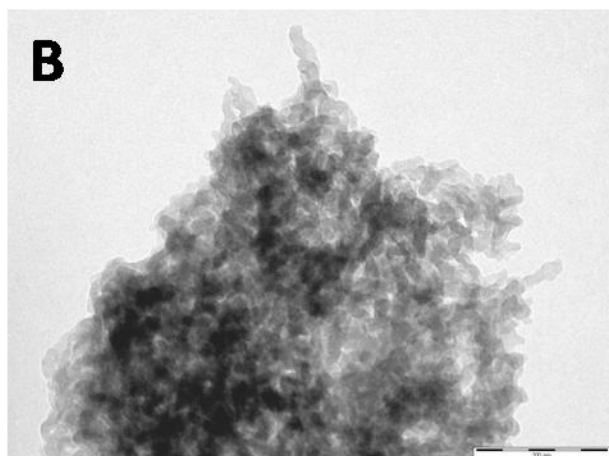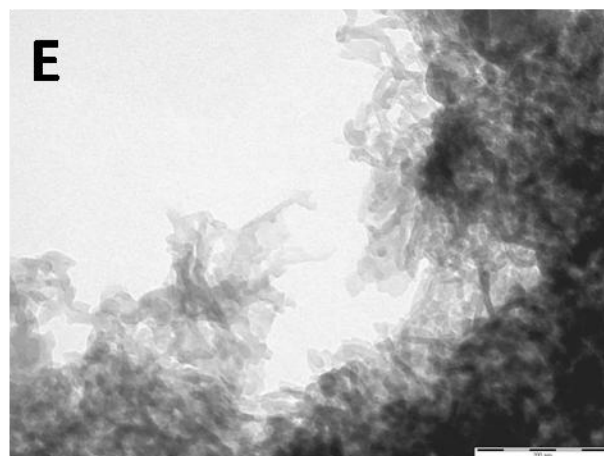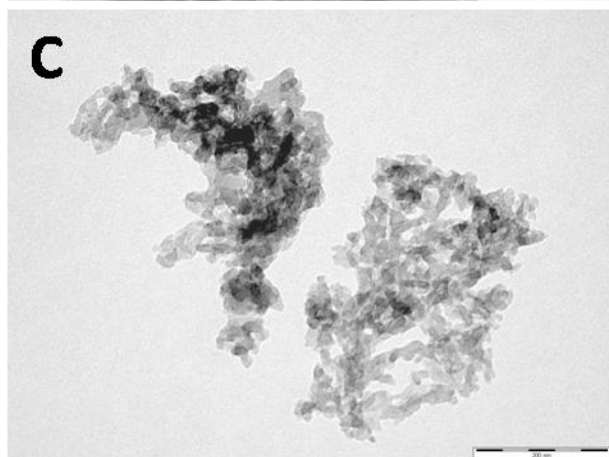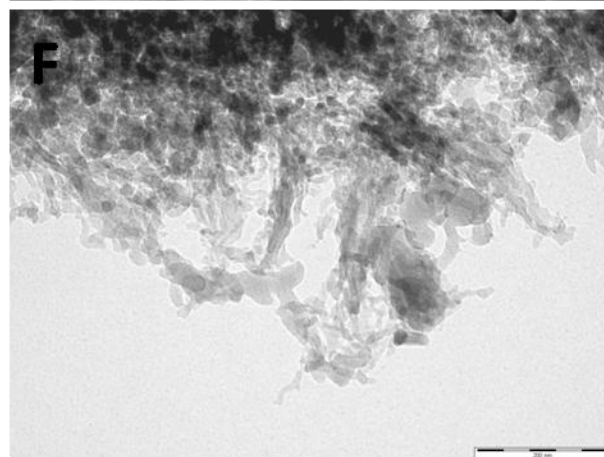

SF. 2 <sup>13</sup>C-MAS NMR of (A) expanded starch, (B) S300, (C) S450, (D) expanded alginate acid, (E) A300 and (F) A450

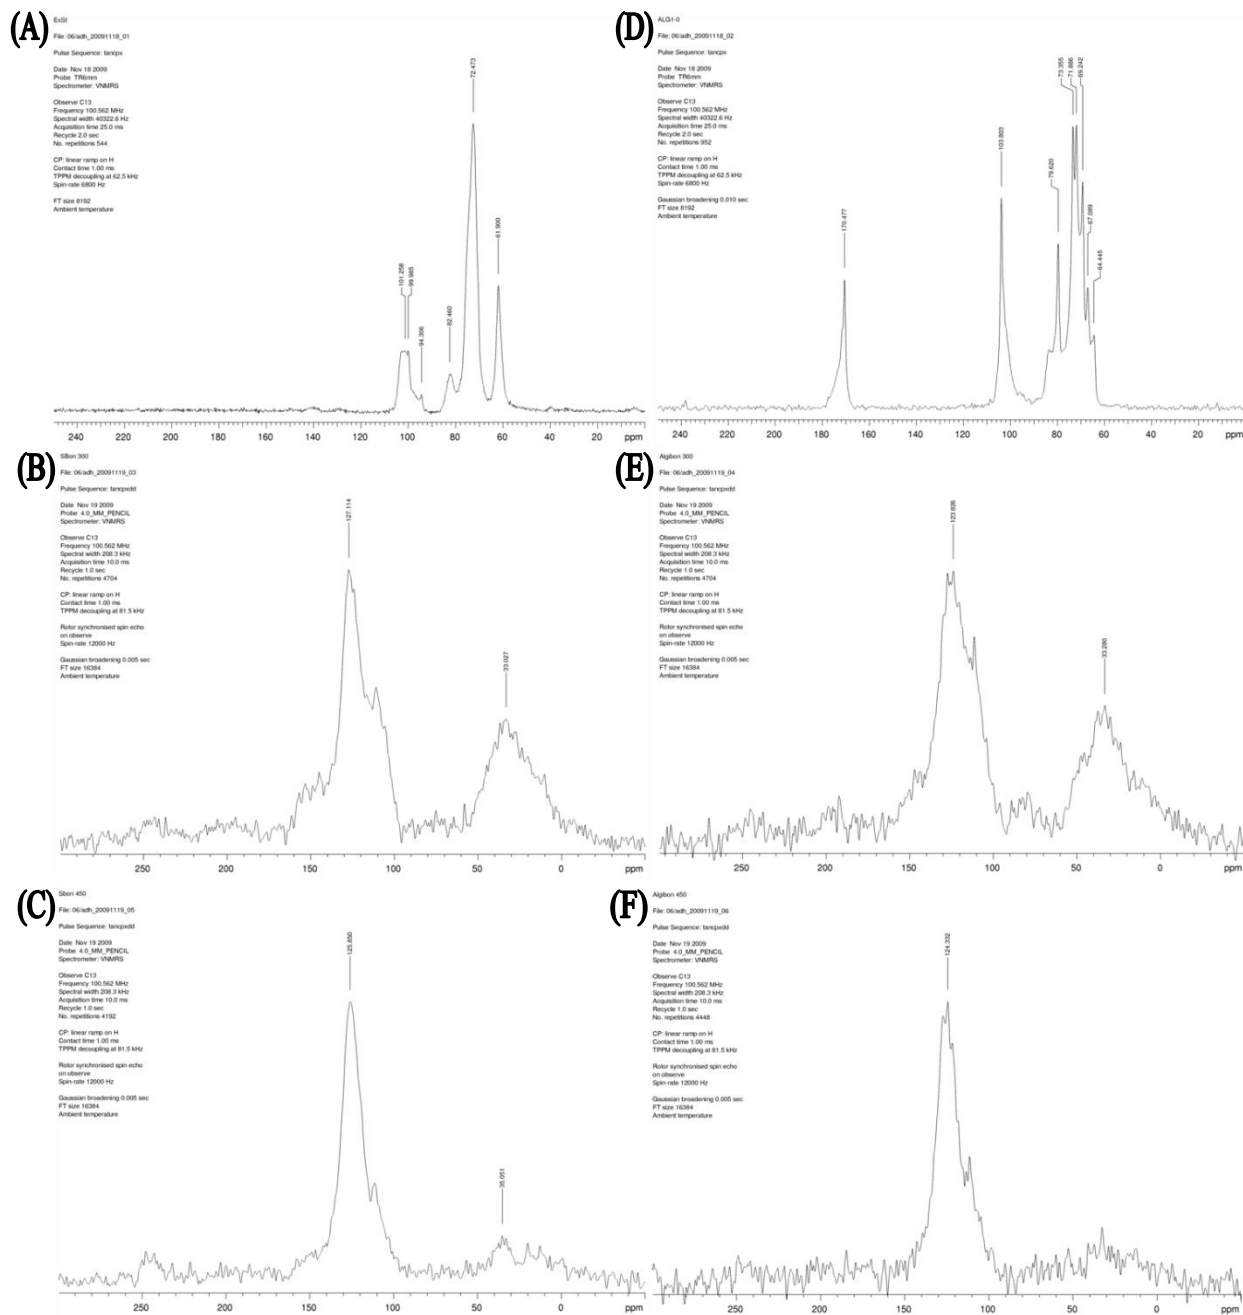

SF. 3 FT-IR spectra of (A) starch Starbons® (B) alginic acid Starbons® at increasing preparation temperatures.

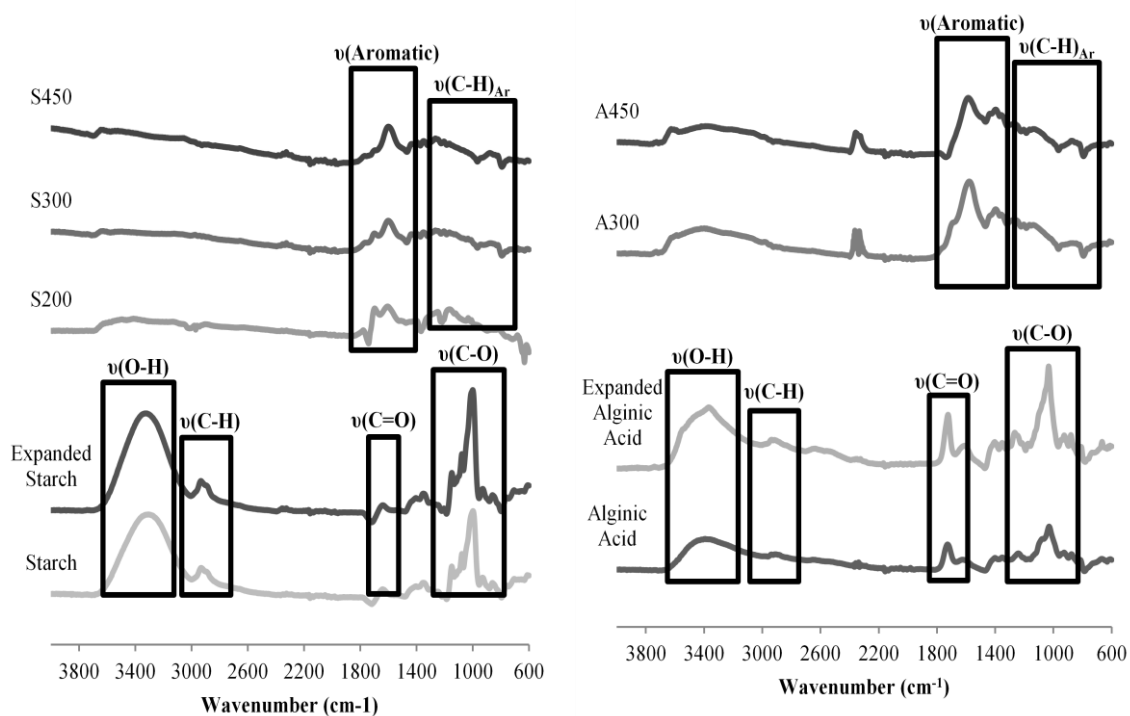

SF. 4 XPS survey scans (A) A300, (B) A800, (C) S300, and (D) S800

(A)

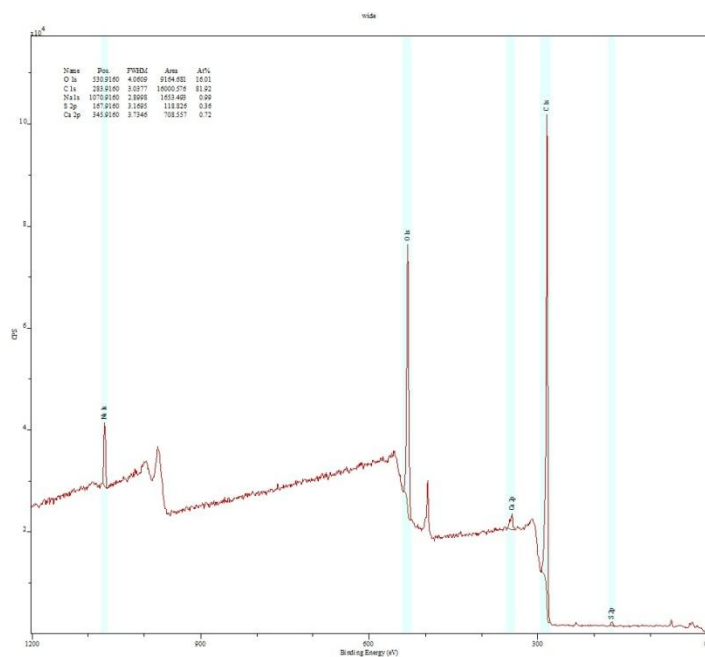

(B)

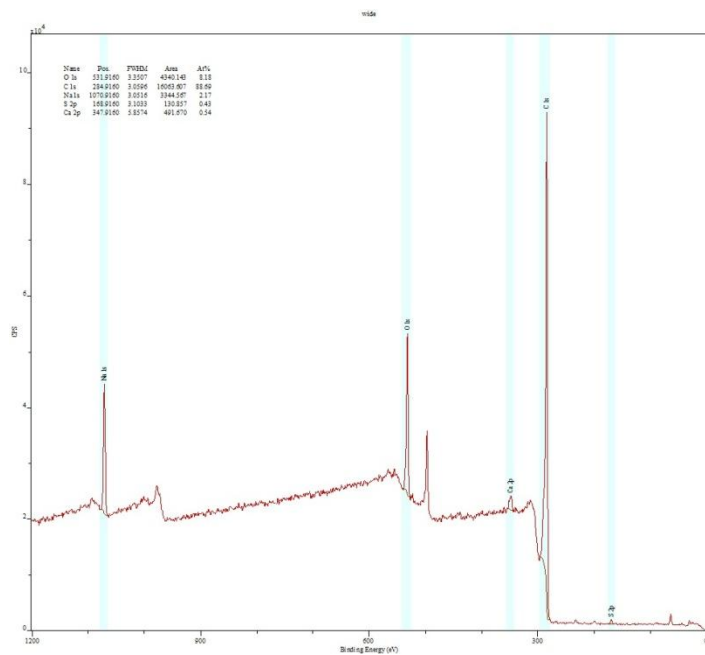

(C)

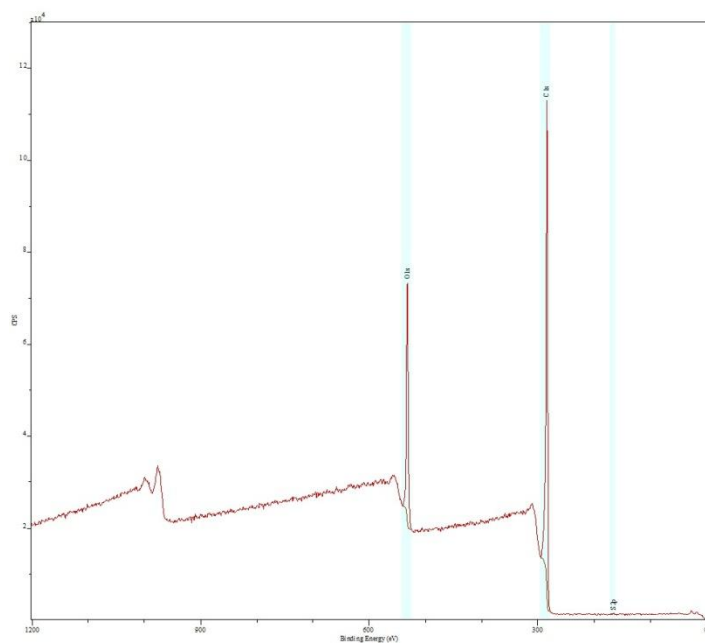

(D)

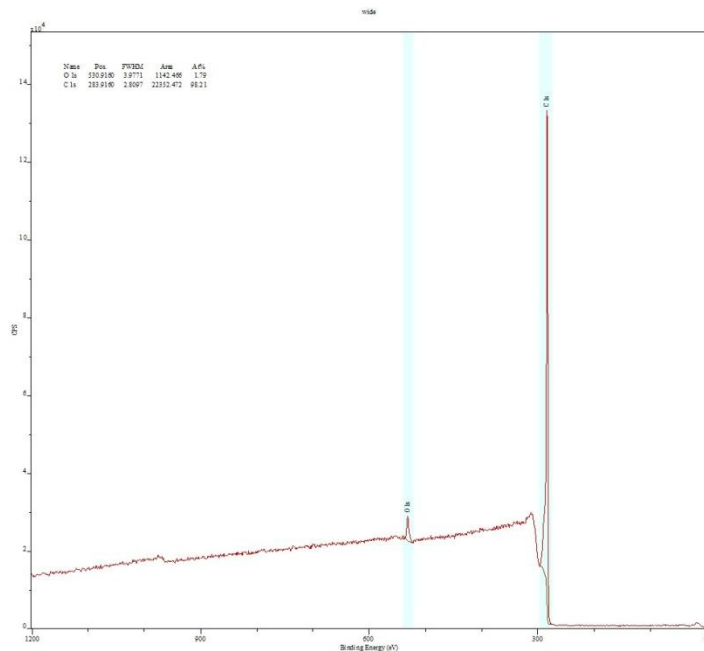

ST 1: CHN analysis of adsorbent materials

|      | %C    | %H   | %N   | %Rest |
|------|-------|------|------|-------|
| S300 | 73.00 | 3.72 | 0.17 |       |
| S800 | 87.97 | 0.87 | 0.20 | 10.96 |
| A300 | 60.06 | 2.76 | 0.28 | 36.90 |
| A800 | 76.94 | 0.72 | 0.34 | 22.00 |

SF 5. Adsorption of acid blue 92 on various adsorbents versus contact time

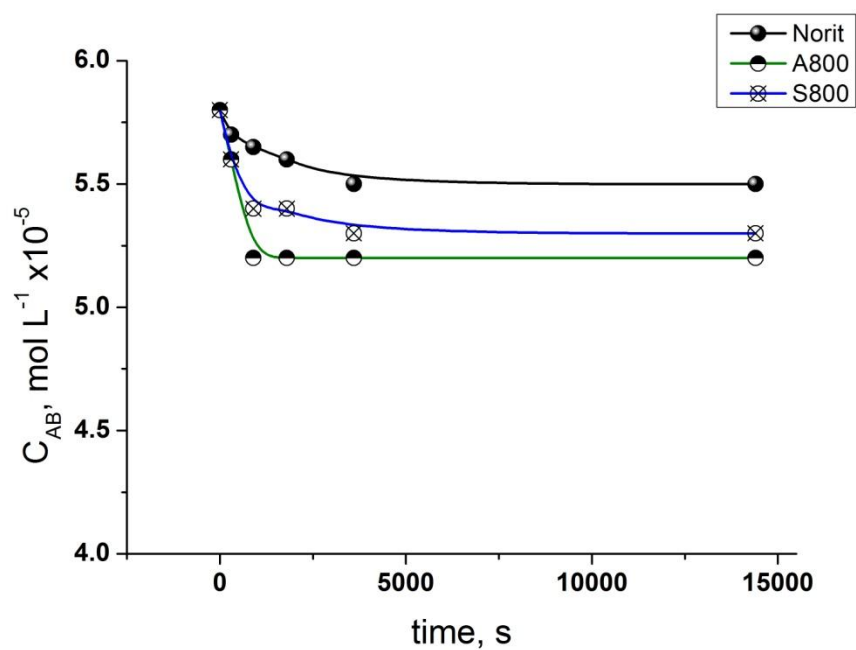

Supplement: c2ra21367b.pdf [file c2ra21367b.pdf]
